# Supplementary material for: Amplification, copy number variation, expression and association of non-synonymous SNP of bovine beta-defensin 129 gene with distinct fertility of cattle bull
Source: Research Square preprint supplement (doi:10.21203/rs.3.rs-744570/v1), 2021-07-28
Supplement: Supplementary file 1 [file 19c6181a645b3238fff0f7a5.docx]

Nucleotide sequences given below in underlined sequences were matched with cross-bred predicted BBD129 gene and non-underlined sequences were found as untranslated region (UTR) of BBD129 mRNA.

FASTA5 Cross-bred RLM-RACE BBD129 5’ Inner PCR

CCCAGATCCAAGGCTTCTTCTCTTGGAAGAAGAGAAGCTTCCAGCCATGAAGCTCCTTTTCCCTATCTTTGCCAGCCTTATGCTACAGTGGCAGGTGAACACAGAATACTTTGGCTTGAGAAGATGCCTAA

FASTA6 Cross-bred RACE BBD129 3’ Inner PCR

TGTCATGATGCAGACCGAACATCATAATTTATCTGTTCTGCCCAAAATCAAAAGTGCCAATGCTTTTGCCAAGATCAACACCATCATCATCCCAAATGCCACCATTGTGAACTCTGCCACCACCAACCCCGTGAACTCAGGGAAGATAATACACACTGCTACTTCTACCAGAAAAAGAAGAGATTTAGGCACTGACTCCCCACCACCAGCACCACCTCCATCGTATATACTTCCGACAGCATAACTGGAGCTGGAGAAGCAGATGAG

FASTA7 Cross-bred BBD129 cDNA PCR

AGAGCACTGCAACATGGATGAAAAAGAGTTAGATAAATGCAAAAAGAAAACATGTTGTATTAGATCAAAAGTGGTTCAACTGATAAAAAACTACATACAAAATGAAATGCTCCATATGCTTAAAGAGGACTCTCAGGAAGTGCTAAAAATTACCAAGAATTTTAGTGTCATGATGCAGACCGAACATCATAATTTATCTGTTCTGCCCAAAATCAAAAGTGCCAATGCTTTTGCCAAGATCAACACCATCATCATCCCAAATGCCACCATTGTGAACTCTGCCACCACCAACCCCGTGAACTCAGGGAAGATAATACACACTGCTACTTCTACCAGAAAAAGAAGAGATTTAGGCACTGACTCCC

FASTA8 Cross-bred BBD129 mRNA complete coding sequence

CCCAGATCCAAGGCTTCTTCTCTTGGAAGAAGAGAAGCTTCCAGCCATGAAGCTCCTTTTCCCTATCTTTGCCAGCCTCATGCTACAGTGGCAGGTGAACACAGAATACTTTGGCTTGAGAAGATGCCTAATGGGTTTGGGGAGATGCAAAGAGCACTGCAACATGGATGAAAAAGAGTTAGATAAATGCAAAAAGAAAACATGTTGTATTAGATCAAAAGTGGTTCAACTGATAAAAAACTACATACAAAATGAAATGCTCCATATGCTTAAAGAGGACTCTCAGGAAGTGCTAAAAATTACCAAGAATTTTAGTGTCATGATGCAGACCGAACATCATAATTTATCTGTTCTGCCCAAAATCAAAAGTGCCAATGCTTTTGCCAAGATCAACACCATCATCATCCCAAATGCCACCATTGTGAACTCTGCCACCACCAACCCCGTGAACTCAGGGAAGATAATACACACTGCTACTTCTACCAGAAAAAGAAGAGATTTAGGCACTGACTCCCCACCACCAGCACCACCTCCATCGTATATACTTCCGACAGCATAACTGGAGCTGGAGAAGCAGATGAG

**GenBank Submissions**

**Submission # 2448405**
